# Supplementary material for: Tailoring the morphology of Pd nanoparticles on CNTs by nitrogen and oxygen functionalization
Source: Royal Society of Chemistry journal article supplement (doi:10.1039/c2cp40861a), 2012-01-01
Supplement: c2cp40861a.pdf [file c2cp40861a.pdf]

**Table S 1:** Catalytic data in aqueous solution.

| Catalyst    | Time  | Conversion | Selectivity |              |         |                 |
|-------------|-------|------------|-------------|--------------|---------|-----------------|
|             |       |            | Aldehyde    | Benzoic acid | Toluene | Benzyl benzoate |
| Pd/NCNF873K | 0.5 h | 46         | 95.6        | 3.9          | 0       | 0.5             |
|             | 2 h   | 92         | 91.8        | 8            | 0       | 0.2             |
| Pd/NCNF673K | 0.5 h | 35         | 95.4        | 3.7          | 0       | 0.9             |
|             | 2 h   | 90         | 94.6        | 4.8          | 0       | 0.6             |
| Pd/NCNF473K | 0.5 h | 33         | 96.8        | 0.9          | 0       | 2.3             |
|             | 2 h   | 70         | 95.7        | 3.6          | 0       | 0.7             |
| Pd/CNF ox   | 0.5 h | 25         | 96.2        | 0            | 3.8     | 0               |
|             | 2 h   | 34         | 97.8        | 1.3          | 0.9     | 0               |
| Pd/VGCNF    | 0.5h  | 5          | 96.8        | 0            | 2.1     | 1.1             |
|             | 2 h   | 18         | 93.1        | 6.2          | 0.1     | 0.6             |

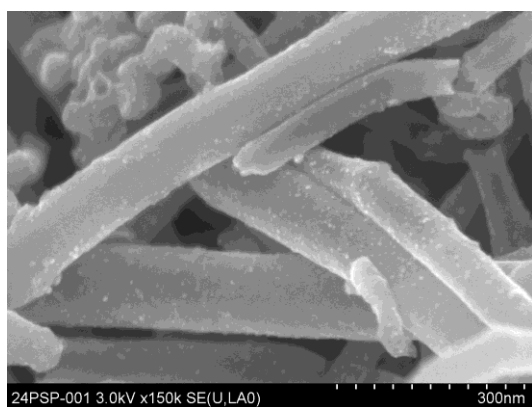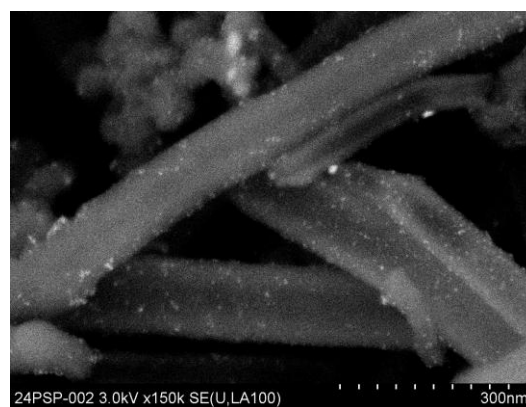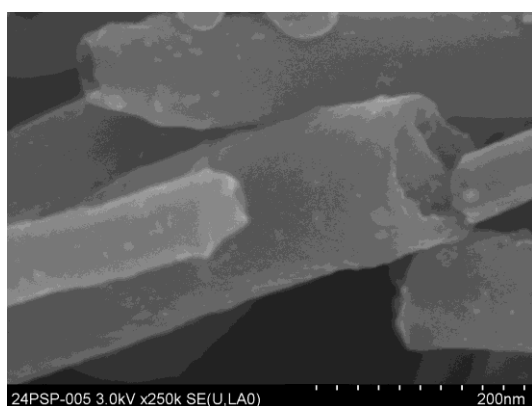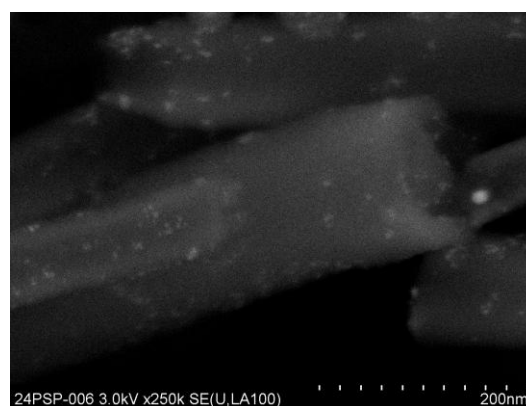

**Figure S 1:** SE (left) and BSE (right) SEM images for the sample Pd-PVA /N-CNT.

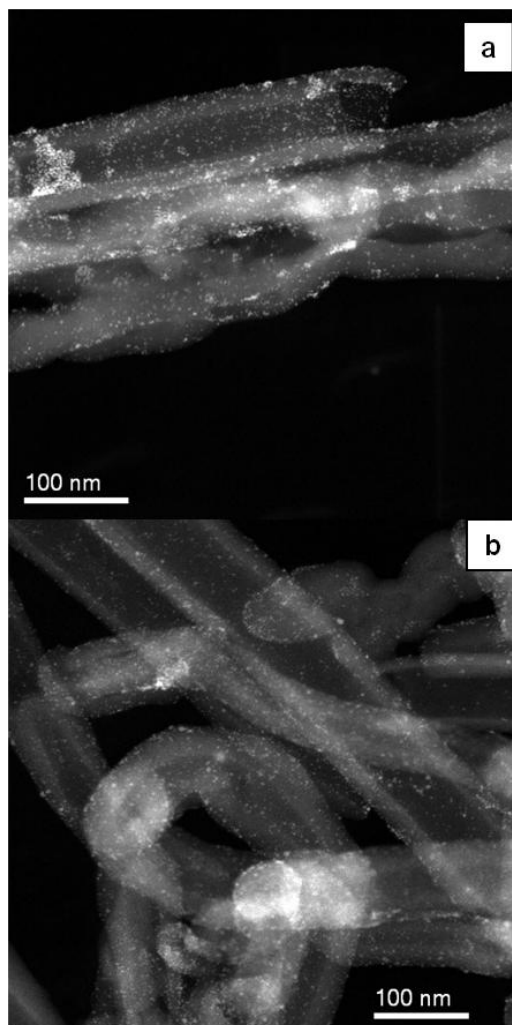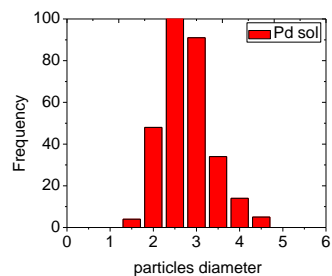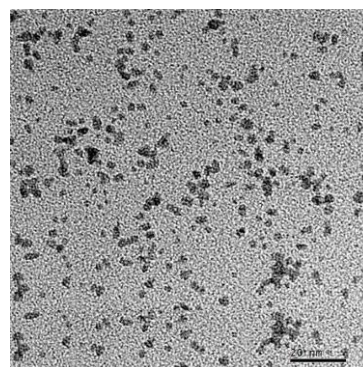

**Figure S3:** Pd sol: Pd particles size distribution; TEM image.

**Figure S2:** (a) HAADF-STEM image for Pd/N-CNT473K; (b) HAADF-STEM image for Pd/N-CNT873K.

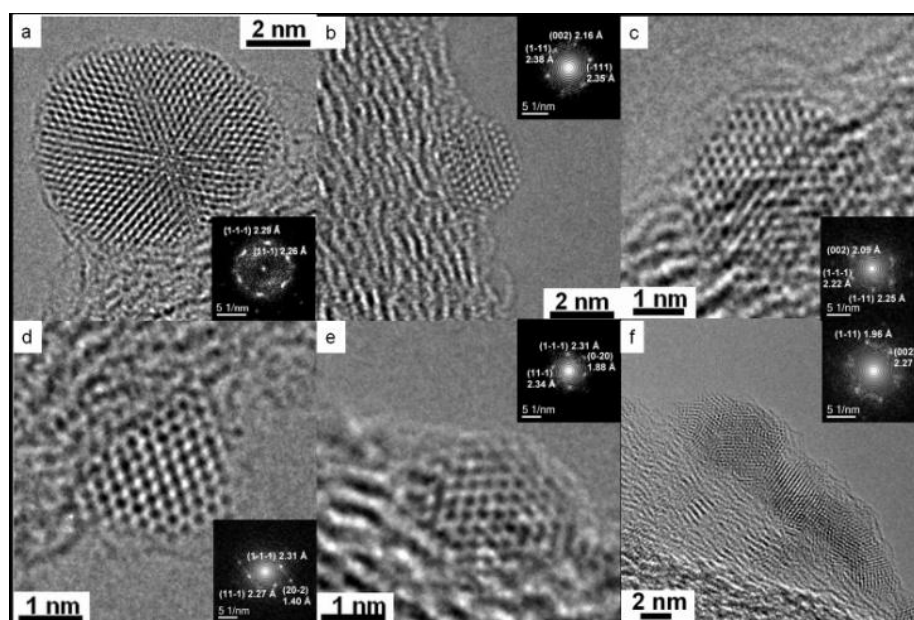

**Figure S4:** Figure 1: HRTEM image for sample Pd/CNT(a); HRTEM image for sample Pd/N-CNT673K (b); Pd/CNTox (c); Pd/N-CNT873K (d); Pd/N-CNT473K (e); agglomerated particles on Pd/N-CNT473K (f).

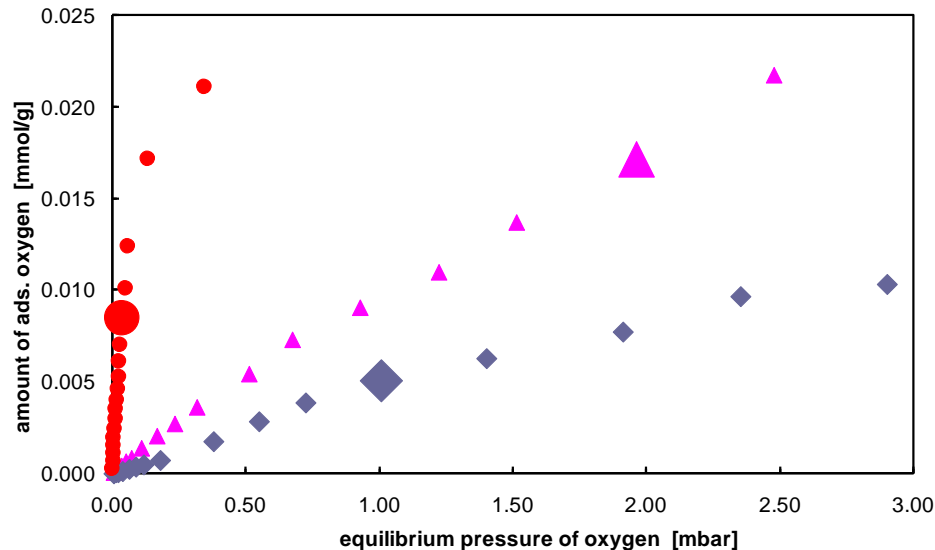

**Figure S5:** O<sub>2</sub> adsorption isotherms: Pd-PVA/N-CNT873K (violet rhombus); Pd-PVA/N-CNT473K (magenta triangles); Pdwi./CNT (red circles). Bigger data point indicates the saturation concentration.

**Table S2:** Quantitative microcalorimetry data for the first 4 pulses. The amount of oxygen converted can be qualitatively estimated by the differential heat registered and amount of irreversible oxygen consumed. A more pronounced opposite tendency is indicative of higher amount of oxygen converted.

|                       | <i>Ads. Step</i> | <i>O<sub>2</sub>Pd/N-CNF473K</i> | - | <i>Pd/N-CNF873K</i>            | - |
|-----------------------|------------------|----------------------------------|---|--------------------------------|---|
|                       | 80°C             | <b>4431</b>                      |   | <b>4441</b>                    |   |
| <b>1<sup>st</sup></b> | n dose           | 0.0609 μmol                      | < | 0.0648 μmol                    |   |
|                       | n oxygen         | 3.9042*10 <sup>-2</sup> μmol/g   | > | 2.289*10 <sup>-2</sup> μmol/g  |   |
|                       | consumption      |                                  |   |                                |   |
|                       | diff. heat       | 543kJ/mol                        | ~ | 518 kJ/mol                     |   |
| <b>2<sup>nd</sup></b> | n dose           | 0.0835 μmol                      | > | 0.0727 μmol                    |   |
|                       | n oxygen         | 8.13*10 <sup>-2</sup> μmol/g     | > | 1.3773*10 <sup>-2</sup> μmol/g |   |
|                       | consumption      |                                  |   |                                |   |
|                       | diff. heat       | 351 kJ/mol                       | < | 726 kJ/mol                     |   |
| <b>3<sup>rd</sup></b> | n dose           | 0.0938 μmol                      | < | 0.1056 μmol                    |   |
|                       | n oxygen         | 6.8331*10 <sup>-2</sup> μmol/g   | > | 4.610*10 <sup>-2</sup> μmol/g  |   |
|                       | consumption      |                                  |   |                                |   |
|                       | diff. heat       | 464 kJ/mol                       | > | 355 kJ/mol                     |   |
| <b>4<sup>th</sup></b> | n dose           | 0.109 μmol                       | < | 0.1306 μmol                    |   |
|                       | n oxygen         | 1.1515*10 <sup>-1</sup> μmol/g   | > | 2.753*10 <sup>-2</sup> μmol/g  |   |
|                       | consumption      |                                  |   |                                |   |
|                       | diff. heat       | 464 kJ/mol                       | < | 710 kJ/mol                     |   |
